# Supplementary material for: scSPLAT, a scalable plate-based protocol for single cell WGBS library preparation
Source: PubMed Central journal article supplement (PMC8986790; doi:10.1038/s41598-022-09798-2), 2022-04-06

## **Supplementary Information**

Supplementary Table S1; Oligo sequences

Supplementary Figures S1-S6

Supplementary Data S1; Sample and read alignment information, excel sheet

Supplementary Data S2; Liver cluster assignments, excel sheet

Supplementary Data S3; DMR annotations, excel sheet

Supplementary Data S4; GO:BP intersections, excel sheet

Supplementary Data S5; DMR-marker overlaps, excel sheet

**Table S1. Oligo sequences**

| Oligo name | Sequence                                         |
|------------|--------------------------------------------------|
| SSO_H_1    | 5AmMC6/TTCCCTACACGACGCTCTTCCGATCTTAGCTTHHHHHHHHH |
| SSO_H_2    | 5AmMC6/TTCCCTACACGACGCTCTTCCGATCTACTTGAHHHHHHHHH |
| SSO_H_3    | 5AmMC6/TTCCCTACACGACGCTCTTCCGATCTGCCAATHHHHHHHHH |
| SSO_H_4    | 5AmMC6/TTCCCTACACGACGCTCTTCCGATCTCGATGTHHHHHHHHH |
| SSO_H_5    | 5AmMC6/TTCCCTACACGACGCTCTTCCGATCTATCACGHHHHHHHHH |
| SSO_H_6    | 5AmMC6/TTCCCTACACGACGCTCTTCCGATCTTGACCAHHHHHHHHH |
| SSO_H_7    | 5AmMC6/TTCCCTACACGACGCTCTTCCGATCTCAGATCHHHHHHHHH |
| SSO_H_8    | 5AmMC6/TTCCCTACACGACGCTCTTCCGATCTCTTGTAAHHHHHHHH |
| SSO_H_9    | 5AmMC6/TTCCCTACACGACGCTCTTCCGATCTGACGAGHHHHHHHHH |
| SSO_H_10   | 5AmMC6/TTCCCTACACGACGCTCTTCCGATCTAAGGTCHHHHHHHHH |
| SSO_H_11   | 5AmMC6/TTCCCTACACGACGCTCTTCCGATCTTGTAGCHHHHHHHHH |
| SSO_H_12   | 5AmMC6/TTCCCTACACGACGCTCTTCCGATCTTTGGCAHHHHHHHHH |
| SSO_H_13   | 5AmMC6/TTCCCTACACGACGCTCTTCCGATCTCTACTGHHHHHHHHH |
| SSO_H_14   | 5AmMC6/TTCCCTACACGACGCTCTTCCGATCTCATATGHHHHHHHHH |
| SSO_H_15   | 5AmMC6/TTCCCTACACGACGCTCTTCCGATCTGTATACHHHHHHHHH |
| SSO_H_16   | 5AmMC6/TTCCCTACACGACGCTCTTCCGATCTACCTTCHHHHHHHHH |
| SSO_H_17   | 5AmMC6/TTCCCTACACGACGCTCTTCCGATCTCTTCCAHHHHHHHHH |
| SSO_H_18   | 5AmMC6/TTCCCTACACGACGCTCTTCCGATCTCGAATGHHHHHHHHH |
| SSO_H_19   | 5AmMC6/TTCCCTACACGACGCTCTTCCGATCTAGCATCHHHHHHHHH |
| SSO_H_20   | 5AmMC6/TTCCCTACACGACGCTCTTCCGATCTTACCGAHHHHHHHHH |
| SSO_H_21   | 5AmMC6/TTCCCTACACGACGCTCTTCCGATCTCAAGGAHHHHHHHHH |
| SSO_H_22   | 5AmMC6/TTCCCTACACGACGCTCTTCCGATCTCCGTAHHHHHHHHH  |
| SSO_H_23   | 5AmMC6/TTCCCTACACGACGCTCTTCCGATCTATAGACHHHHHHHHH |
| SSO_H_24   | 5AmMC6/TTCCCTACACGACGCTCTTCCGATCTAGGTCTHHHHHHHHH |
| SSO_H_25   | 5AmMC6/TTCCCTACACGACGCTCTTCCGATCTGGAATGHHHHHHHHH |
| SSO_H_26   | 5AmMC6/TTCCCTACACGACGCTCTTCCGATCTGCTTCAHHHHHHHHH |
| SSO_H_27   | 5AmMC6/TTCCCTACACGACGCTCTTCCGATCTTCTATHHHHHHHHH  |
| SSO_H_28   | 5AmMC6/TTCCCTACACGACGCTCTTCCGATCTTAAGGCHHHHHHHHH |
| SSO_H_29   | 5AmMC6/TTCCCTACACGACGCTCTTCCGATCTAACCTGHHHHHHHHH |
| SSO_H_30   | 5AmMC6/TTCCCTACACGACGCTCTTCCGATCTTTCCCGHHHHHHHHH |
| SSO_H_31   | 5AmMC6/TTCCCTACACGACGCTCTTCCGATCTGATCATHHHHHHHHH |
| SSO_H_32   | 5AmMC6/TTCCCTACACGACGCTCTTCCGATCTGCACTTHHHHHHHHH |
| ss1a       | 5'AmMC6/GACGTGTGCTCTTCCGATCTNNNNNN/3'AmMo        |
| ss1b       | 5'Phos/AGATCGGAAGAGCACACGTC/3'AmMo               |

**Supplementary Fig. S1 Examples of TapeStation profiles.** Library size profiles for pooled scSPLAT libraries

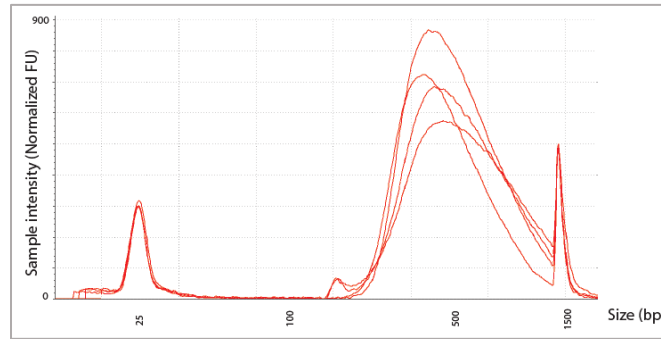

**Supplementary Fig. S2 Demultiplexing profiles.** A) K562 16-cell pools and B) liver nuclei 32-cell pools. The bars represent the proportion of reads assigned to each cell in the pool.

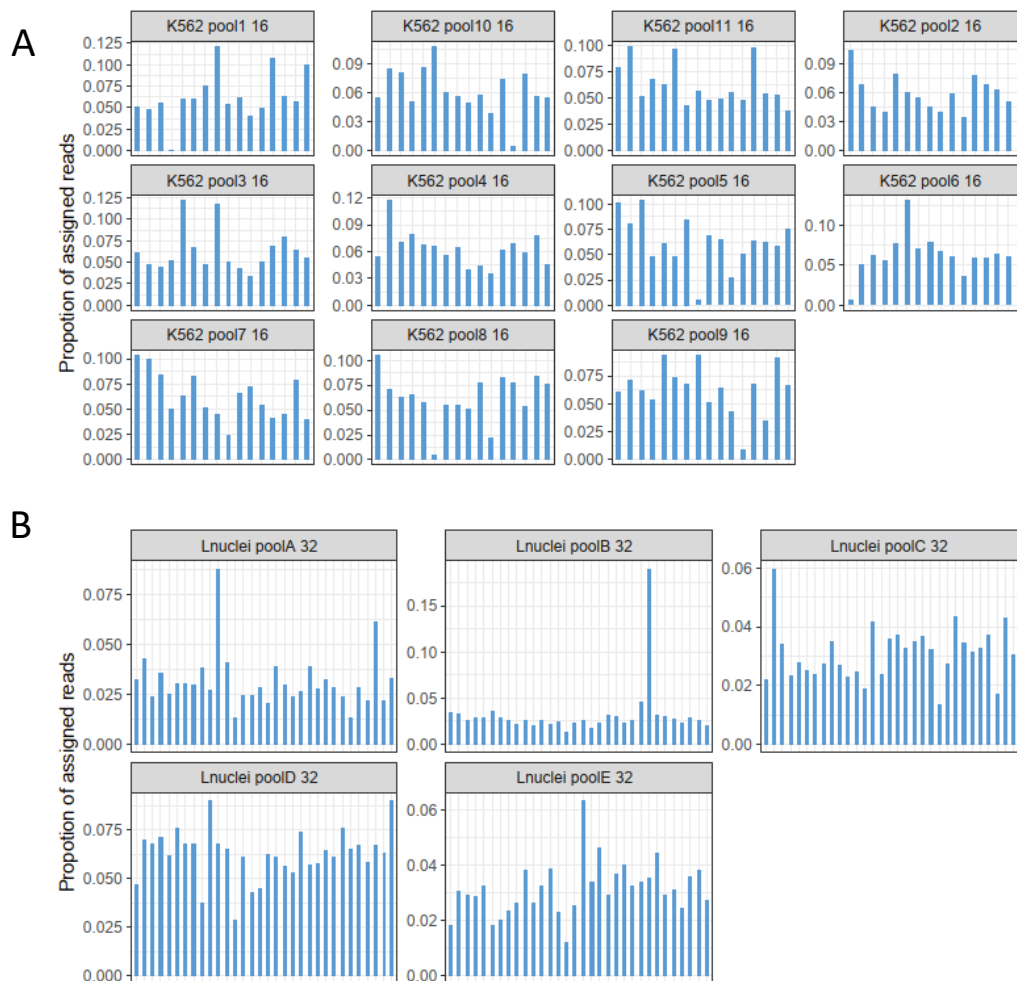

**Supplementary Fig S3 K562 and liver nuclei EpiClomal Region clustering based on methylation in CpG islands.** A) K562 cells colored by batch. B) K562 cells colored pool-wise. C) Liver nuclei colored by batch. D) Liver nuclei colored pool-wise.

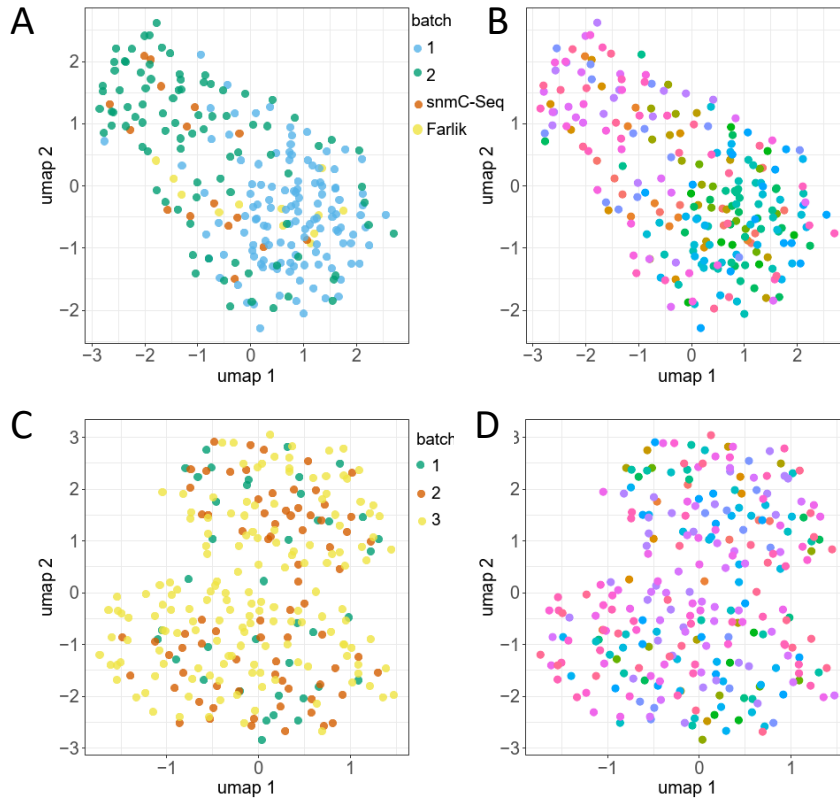

**Supplementary Fig. S4 Alternative clustering of K562 cells.** EpiClomal Region assigned all K562 cells to a single cluster irrespective of whether the clustering was performed based on methylation in CpG islands, gene bodies or TSS regions. A) K562 EpiClomal Region clustering based on methylation in gene bodies. Cells colored by batch. Although it appears like a small number of cells form a ‘subcluster’ in the UMAP plot, they were all assigned to one single cluster by EpiClomal. B) K562 EpiClomal Region clustering based on methylation in regions of 1000 bp +/- of TSS. Cells colored by batch.

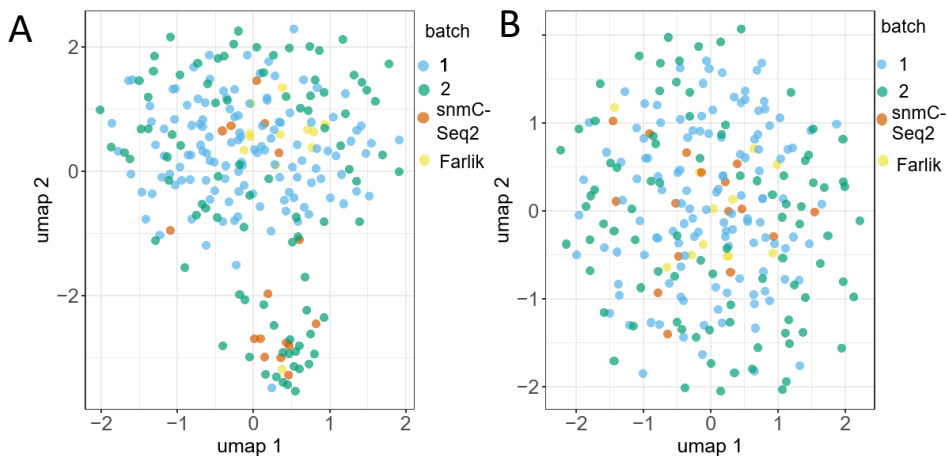

**Supplementary Fig. S5 Liver nuclei QC metrics** A) Number of detected CpG sites per cell vs sequencing depth B) Global methylation levels and read alignment efficiency per nuclei.

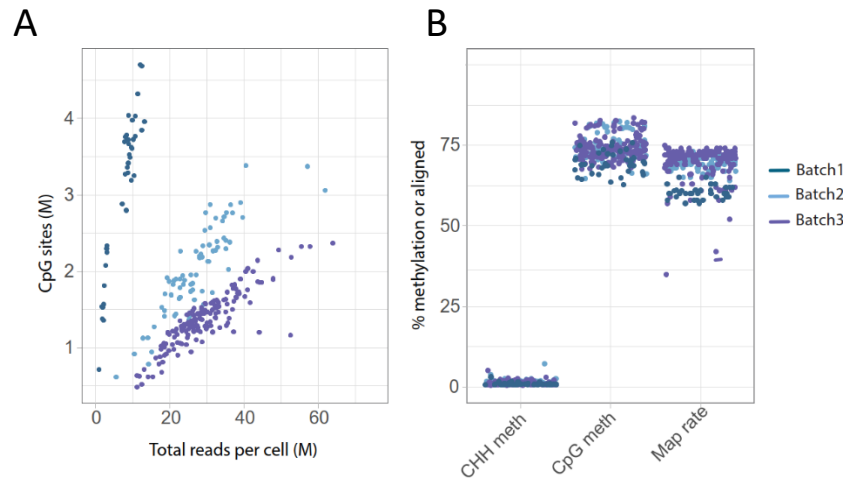

**Supplementary Fig. S6 Reclustering of liver nuclei cluster 1.** Clustering was performed on: CpG island methylation, gene body methylation and methylation across TSS regions. With the two latter EpiClomal finds one cluster only. In contrast, with CpG-island methylation EpiClomal assigns the cells to two clusters that were were intermingled in the UMAP visualization.

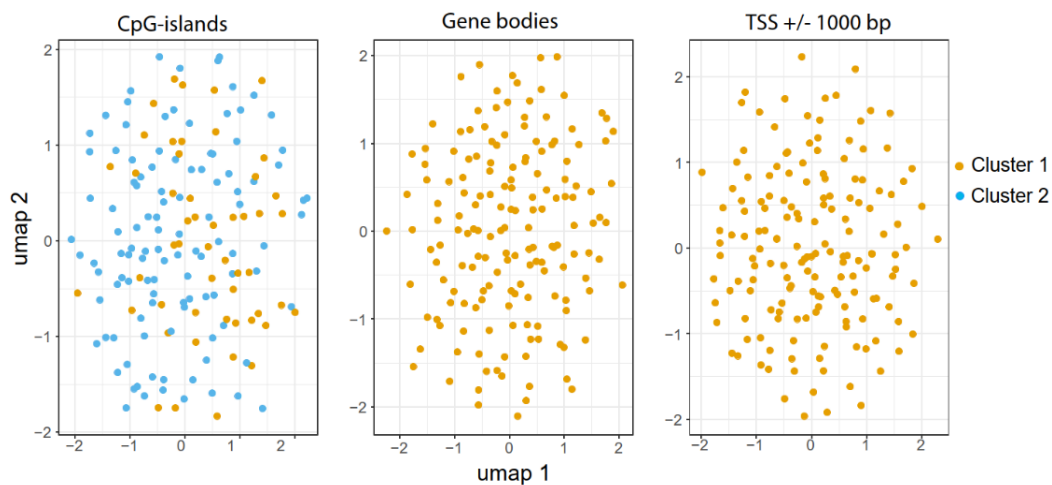

Supplement: 41598_2022_9798_MOESM1_ESM.pdf [file 41598_2022_9798_MOESM1_ESM.pdf]
